# Supplementary material
Source: publisher figshare collection journal article supplement (https://acs.figshare.com/ndownloader/files/4600495)

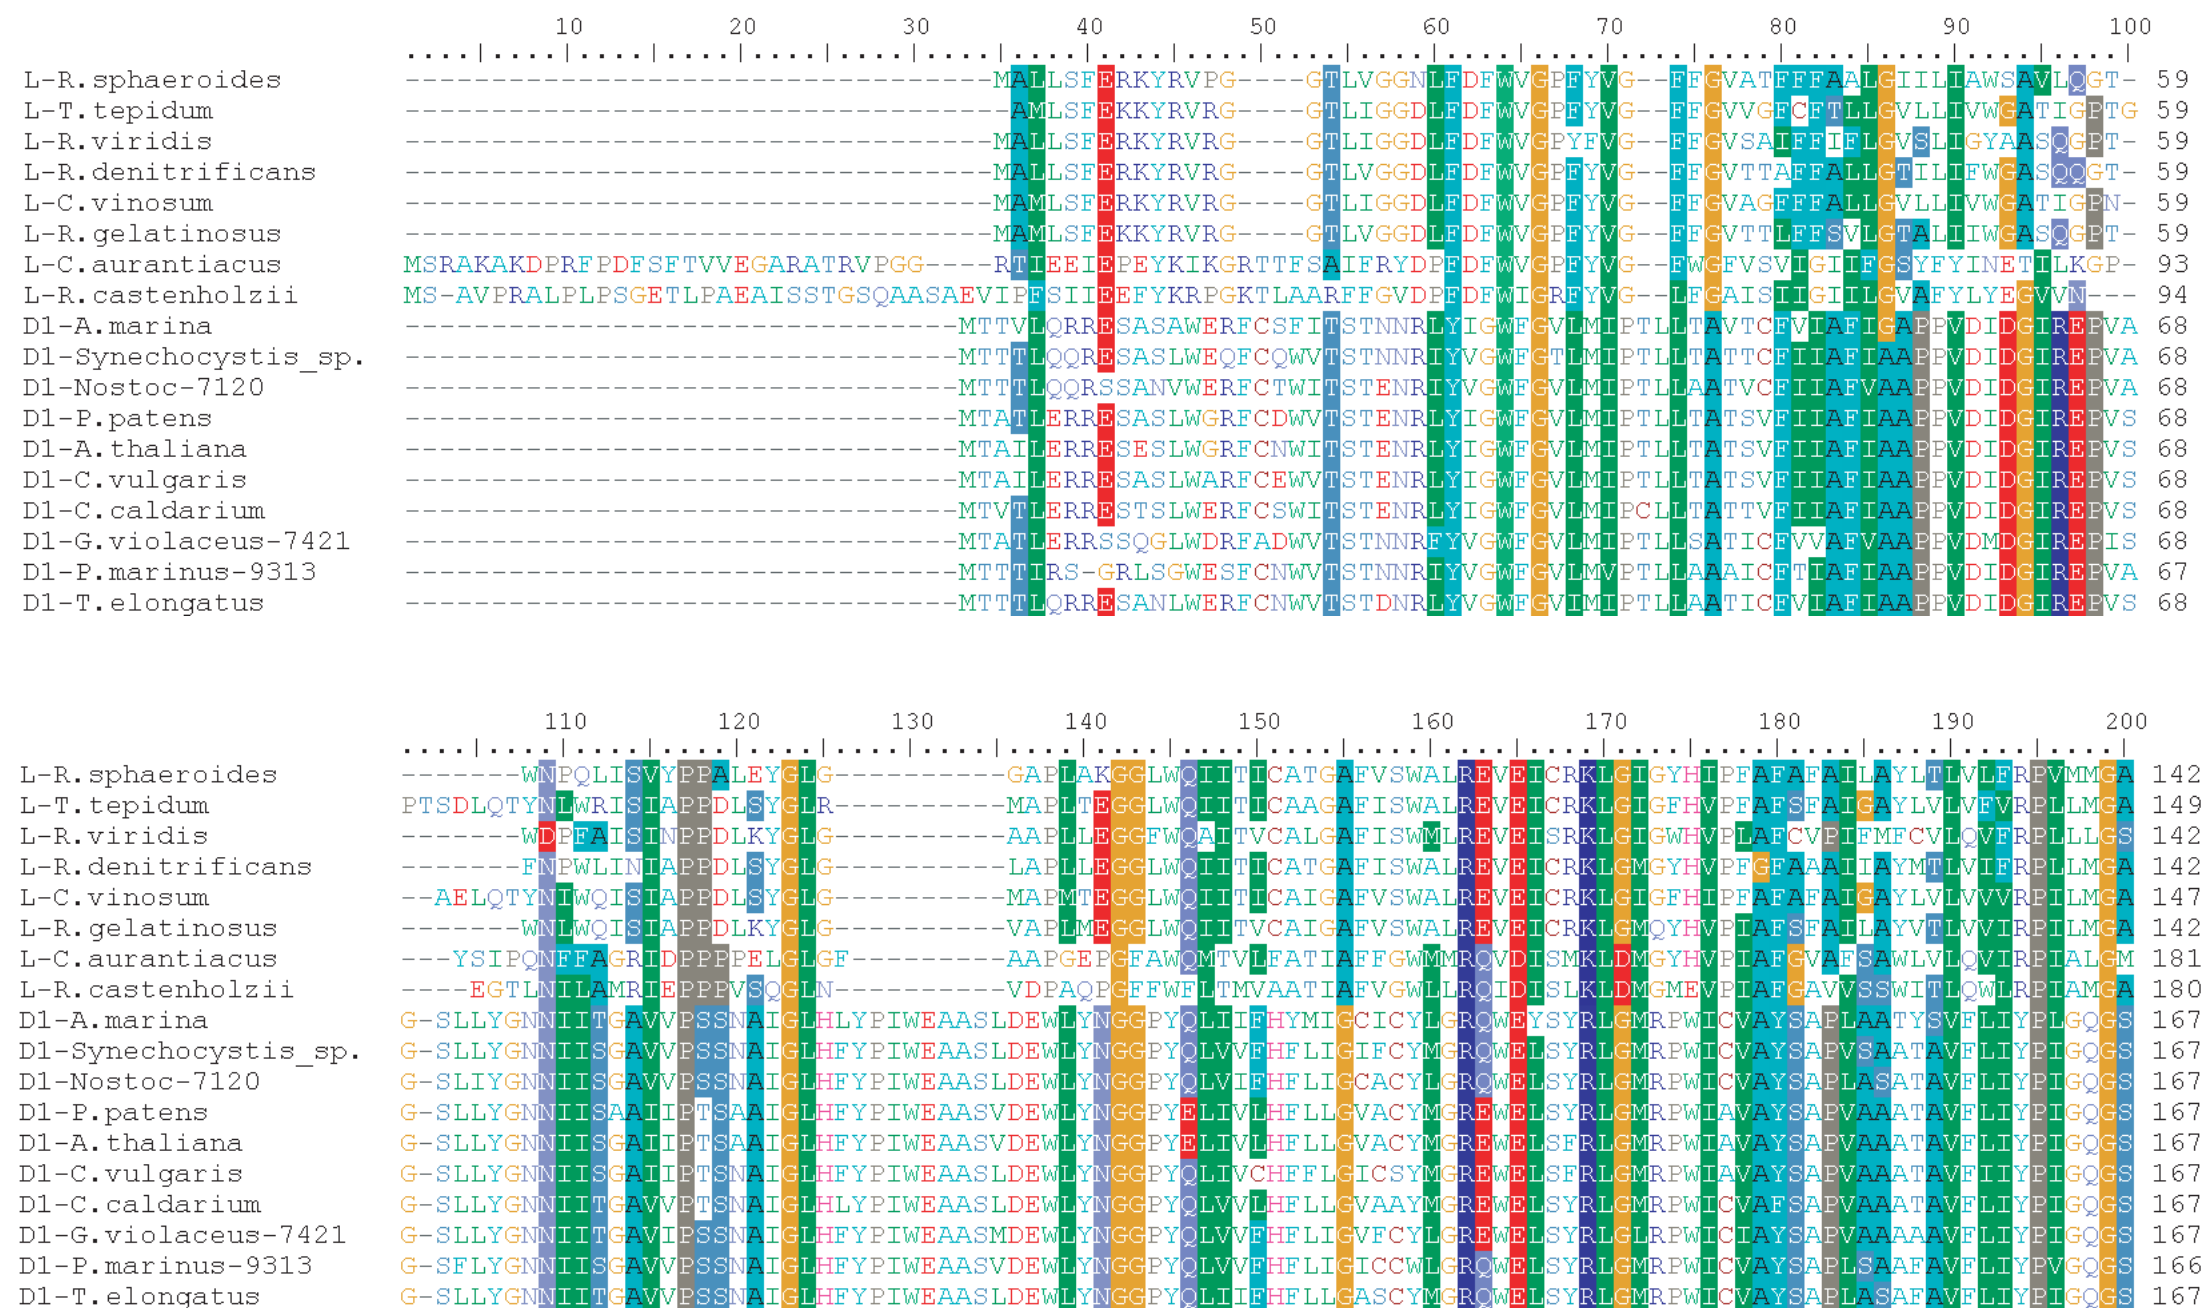

Figure S2 Yamasaki et al.

Supplement: Supplementary file 1 [file 4600495]
